# Supplementary material for: Cortical Structural Connectivity Alterations in Primary Insomnia: Insights from MRI-Based Morphometric Correlation Analysis
Source: PubMed Central journal article supplement (PMC4619857; doi:10.1155/2015/817595), 2015-10-11
Supplement: 817595.f1.pdf [file 817595.f1.pdf]

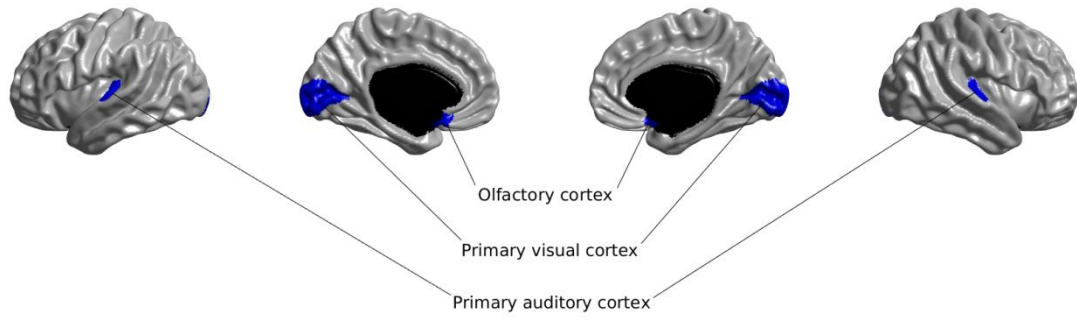

**Supplementary Figure S1:** Seed regions for structural covariance network construction (the bilateral primary visual cortex (calcarine fissure and surrounding cortex), the bilateral primary auditory cortex (heschl's gyri) and the bilateral olfactory cortex) delineated using the AAL atlas.
